# Supplementary material for: Bioorthogonal oncolytic-virus nanovesicles combined bio-immunotherapy with CAR-T cells for solid tumors
Source: Royal Society of Chemistry journal article supplement (doi:10.1039/d4bm01305k), 2024-11-19
Supplement: d4bm01305k1.pdf [file d4bm01305k1.pdf]

## Supplemental information

### **Bioorthogonal oncolytic-virus nanovesicles combined bio-immunotherapy with CAR-T cell for solid tumors**

Guojun Huang <sup>a,†</sup>, Yiran He <sup>a,b,†</sup>, Xiaocong Chen <sup>a</sup>, Ting Yin <sup>a</sup>, Aiqing Ma <sup>a</sup>, Lizheng Zhu <sup>a</sup>, Liqi Chen <sup>a,b</sup>, Ruijing Liang <sup>a,b</sup>, Pengfei Zhang <sup>a,b,\*</sup>, Hong Pan <sup>a,b,\*</sup>, Lintao Cai <sup>a,b,c,\*</sup>

<sup>a</sup> Guangdong Key Laboratory of Nanomedicine, CAS-HK Joint Lab of Biomaterials, Shenzhen Institute of Advanced Technology (SIAT), Chinese Academy of Sciences (CAS), Shenzhen, 518055, China

<sup>b</sup> University of Chinese Academy of Sciences, Beijing, 100049, China

<sup>c</sup> Sino-European Center of Biomedicine and Health, Luohu, Shenzhen 518024, China

† These authors contributed equally to this work

\* Corresponding E-mail: [lt.cai@siat.ac.cn](mailto:lt.cai@siat.ac.cn); [hong.pan@siat.ac.cn](mailto:hong.pan@siat.ac.cn); [pf.zhang@siat.ac.cn](mailto:pf.zhang@siat.ac.cn)

**Supplemental figures:**

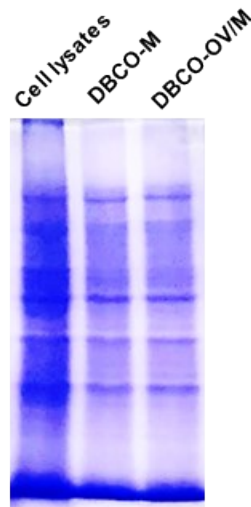

Figure S1. Sodium dodecyl sulfate - polyacrylamide gel electrophoresis (SDS-PAGE) analysis of cell lysates, DBCO-M, and DBCO-OV/M.

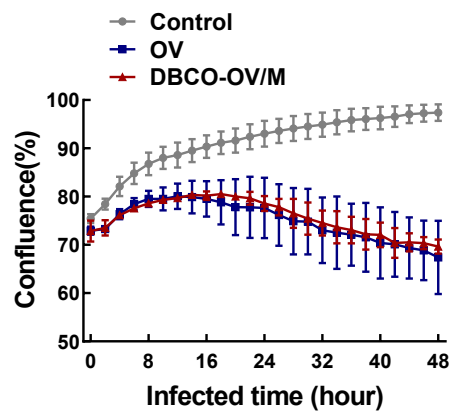

Figure S2. Cell confluence of SPCA-1 during the infection of OV or DBCO-OV/M in 48 h. The cytotoxicity of naked OV ( $1 \times 10^8$  VPs) and OV/M was analyzed by cell confluence. Cell confluence indicated host cell viability which was real-time monitored using Agilent xCELLigence RTCA.

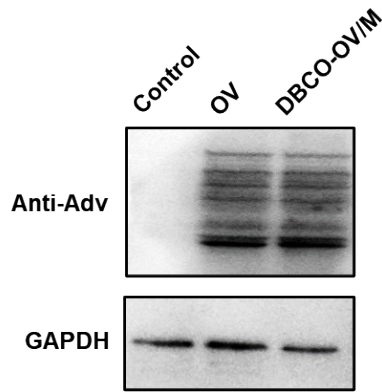

Figure S3. Western blotting assay of adenovirus proteins on OV or DBCO-OV/M treated cells, confirming the infecting capability of DBCO-OV/M.

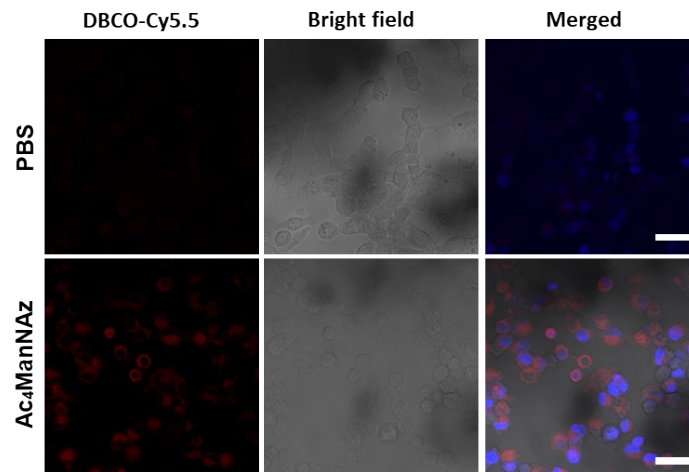

Figure S4. CLSM images of SPCA-1 cells treated with PBS or AC<sub>4</sub>ManNAz. Azide modification for SPCA-1 cells through bioorthogonal glycometabolic labeling. DBCO-cy5.5 probe was used for detecting labeling of N<sub>3</sub> group. Scale bar= 25 μm.

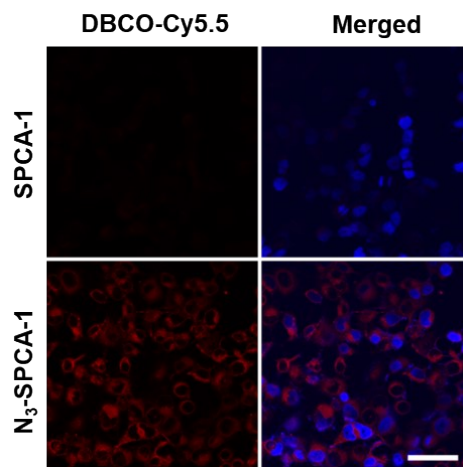

Figure S5. SPCA-1 subcutaneous tumor was injected with AC<sub>4</sub>ManNAz for Azide modification. CLSM images of tumor slides of SPCA-1 or N<sub>3</sub>-SPCA-1 treated with DBCO-Cy5.5. Scale bar= 100 μm.

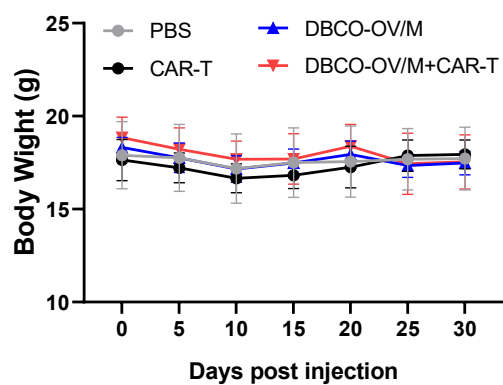

Figure S6. The body weight of mice treated with PBS (control), DBCO-OV/M nanovesicles, CAR-T, or DBCO-OV/M nanovesicles + CAR-T.

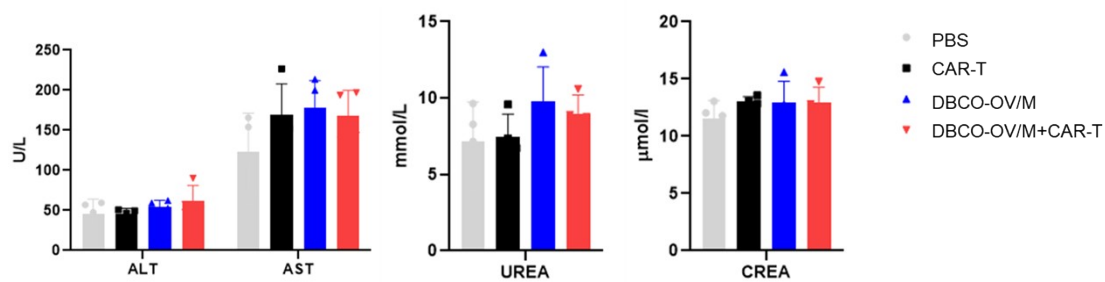

Figure S7. Liver and kidney functionality by blood test parameters after administration (mean  $\pm$  s.e.m., n = 3). no significance.

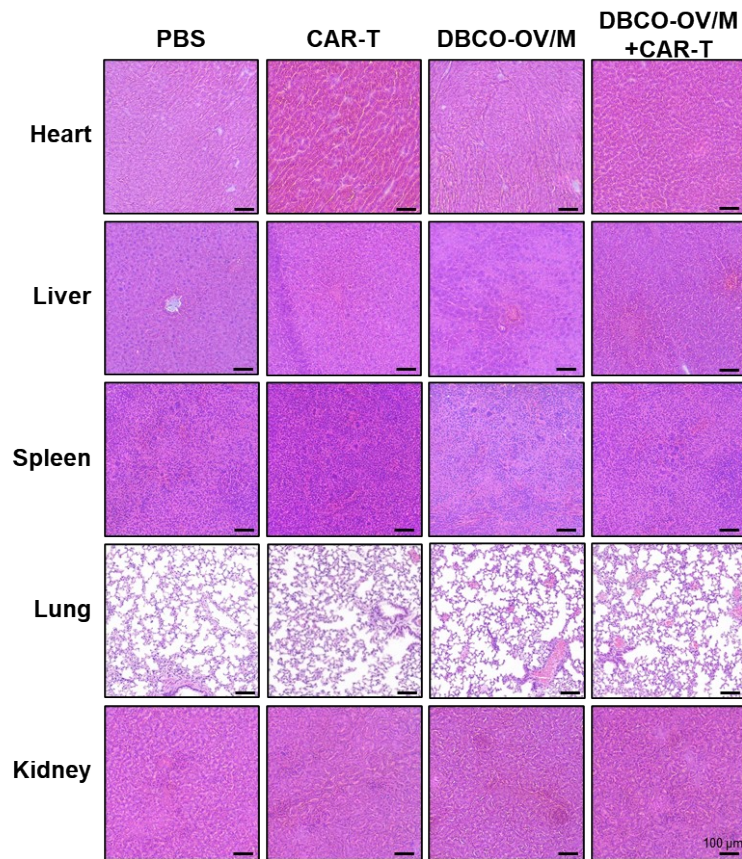

Figure S8. Tissue slices of major organ analyzed by Hematein-Eosin stain. No obvious differences in various groups were observed when compared with that in the PBS group. Scale bar = 100  $\mu$ m.
