# Supplementary material for: Bioorthogonal oncolytic-virus nanovesicles combined bio-immunotherapy with CAR-T cells for solid tumors
Source: Royal Society of Chemistry journal article supplement (doi:10.1039/d4bm01305k), 2024-11-19
Supplement: d4bm01305k2.pdf [file d4bm01305k2.pdf]

## Supplemental information

### Raw data of western blot and gel

#### **Bioorthogonal oncolytic-virus nanovesicles combined bio-immunotherapy with CAR-T cell for solid tumors**

Guojun Huang <sup>a,†</sup>, Yiran He <sup>a,b,†</sup>, Xiaocong Chen <sup>a</sup>, Ting Yin <sup>a</sup>, Aiqing Ma <sup>a</sup>, Lizheng Zhu <sup>a</sup>, Liqi Chen <sup>a,b</sup>, Ruijing Liang <sup>a,b</sup>, Pengfei Zhang <sup>a,b,\*</sup>, Hong Pan <sup>a,b,\*</sup>, Lintao Cai <sup>a,b,c,\*</sup>

<sup>a</sup> Guangdong Key Laboratory of Nanomedicine, CAS-HK Joint Lab of Biomaterials, Shenzhen Institute of Advanced Technology (SIAT), Chinese Academy of Sciences (CAS), Shenzhen, 518055, China

<sup>b</sup> University of Chinese Academy of Sciences, Beijing, 100049, China

<sup>c</sup> Sino-European Center of Biomedicine and Health, Luohu, Shenzhen 518024, China

<sup>†</sup> These authors contributed equally to this work

\* Corresponding E-mail: [lt.cai@siat.ac.cn](mailto:lt.cai@siat.ac.cn); [hong.pan@siat.ac.cn](mailto:hong.pan@siat.ac.cn); [pf.zhang@siat.ac.cn](mailto:pf.zhang@siat.ac.cn)

### Galectin-3 (~31 kD)

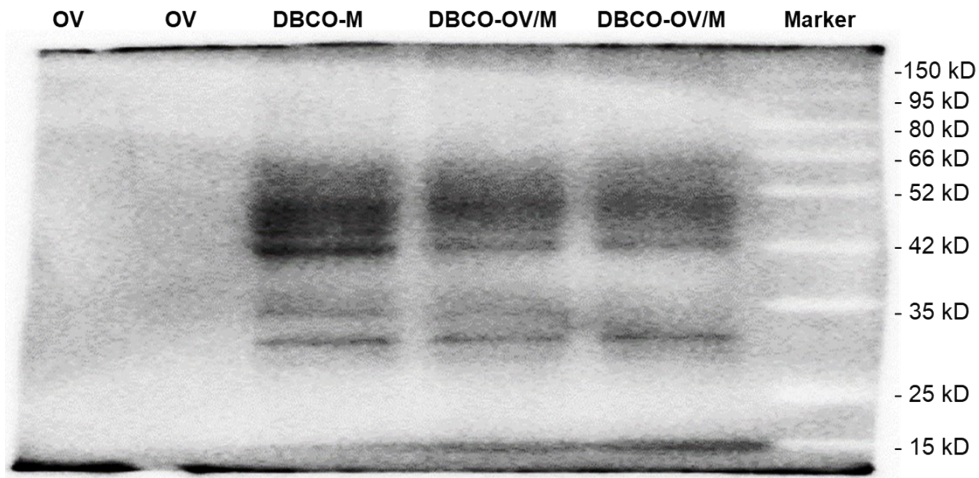

**Figure SR1.** The original image of the full gel and blot on galectin-3 of western blot results in Figure 1A. The molecular weight of galectin-3 is about 31 kDa.

### N-cadherin (75-90 kD)

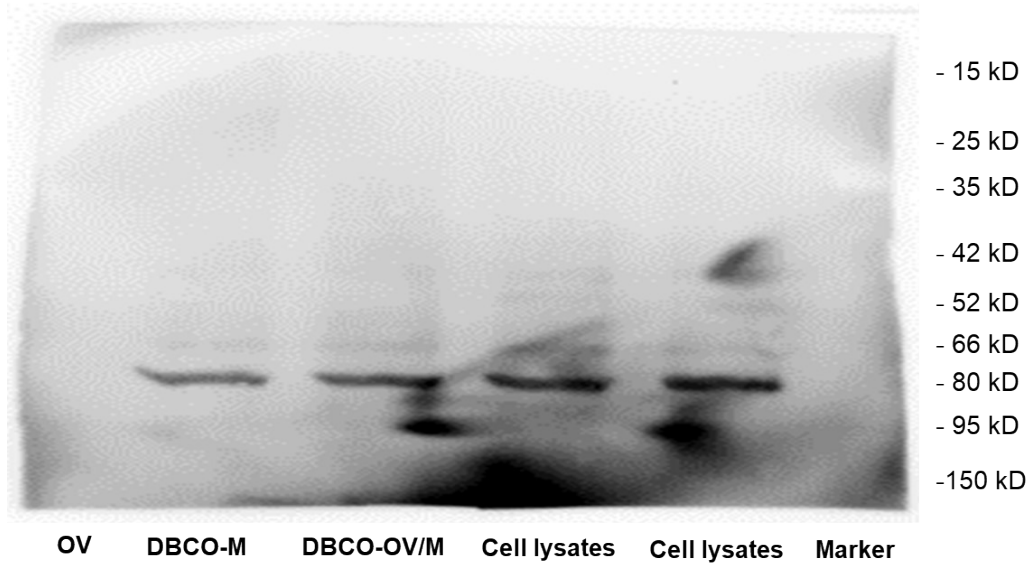

**Figure SR2.** The original image of the full gel and blot on N-cadherin of western blot results in Figure 1A. The molecular weight of N-cadherin is about 75-90 kDa.

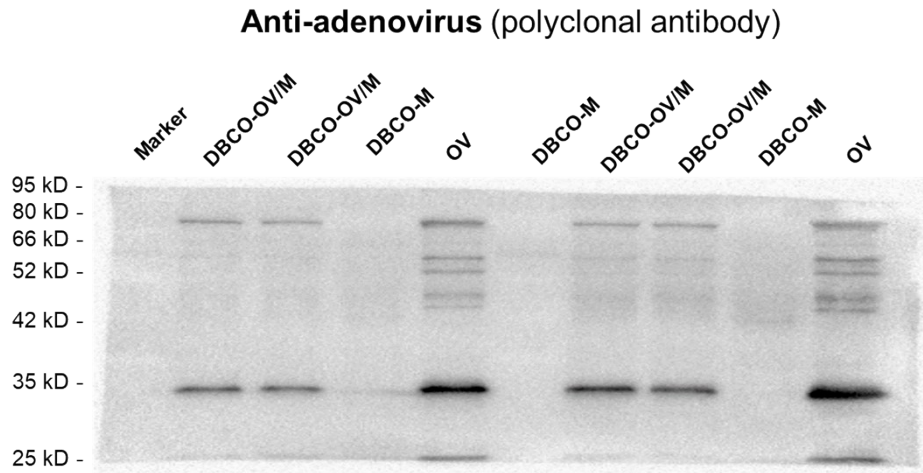

**Figure SR3.** The original image of the full gel and blot on adenovirus of western blot results in Figure 1A. The analysis of adenovirus encapsulate on DBCO-OV/M was detected by anti-adenovirus polyclonal antibody.

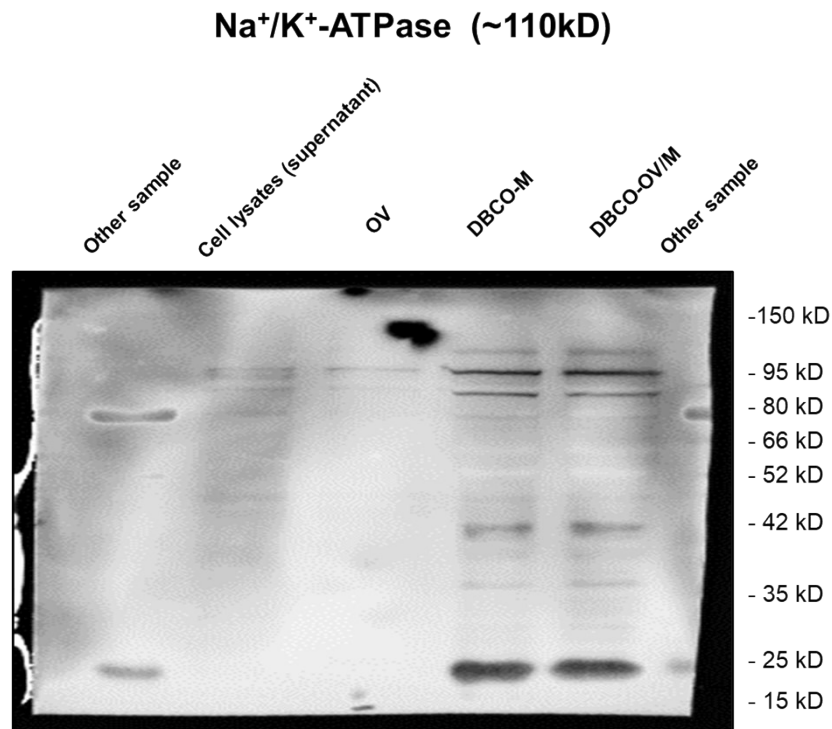

**Figure SR4.** The original image of the full gel and blot on Na<sup>+</sup>/K<sup>+</sup>-ATPase of western blot results in Figure 1A. The molecular weight of Na<sup>+</sup>/K<sup>+</sup>-ATPase is about 110 kDa.

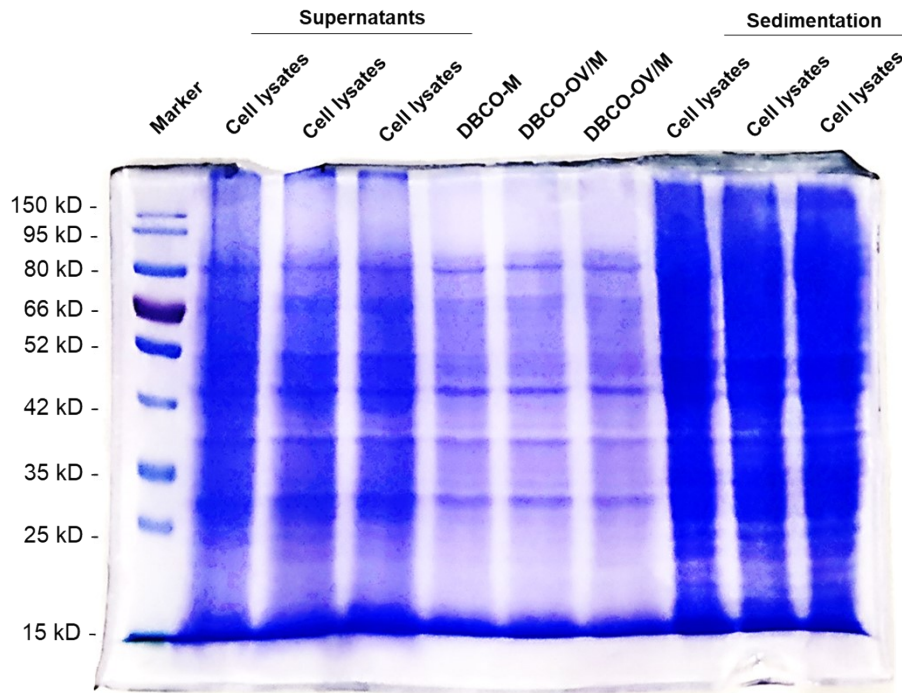

**Figure SR5.** The original image of the full gel on sodium dodecyl sulfate - polyacrylamide gel electrophoresis (SDS-PAGE) analysis of cell lysates, DBCO-M, and DBCO-OV/M in Figure S1.

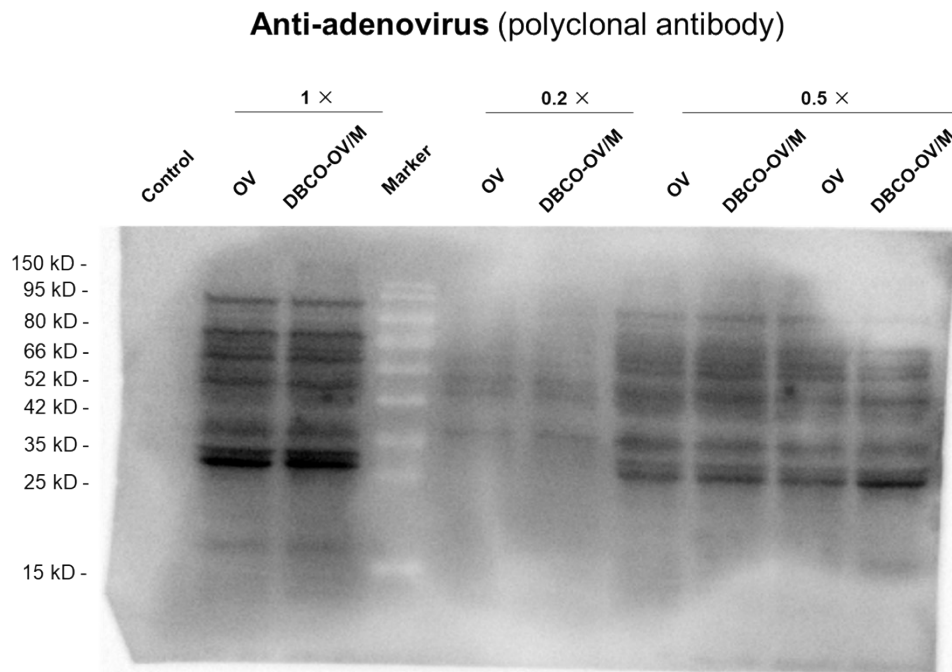

**Figure SR6.** The original image of the full gel and blot on adenovirus of western blot results in Figure S3. The analysis of adenovirus on OV or DBCO-OV/M infected cells was detected by anti-adenovirus polyclonal antibody. Control, OV, DBCO-OV group in Figure S3 and other samples were performed in another PVDF membrane for western blot analysis.

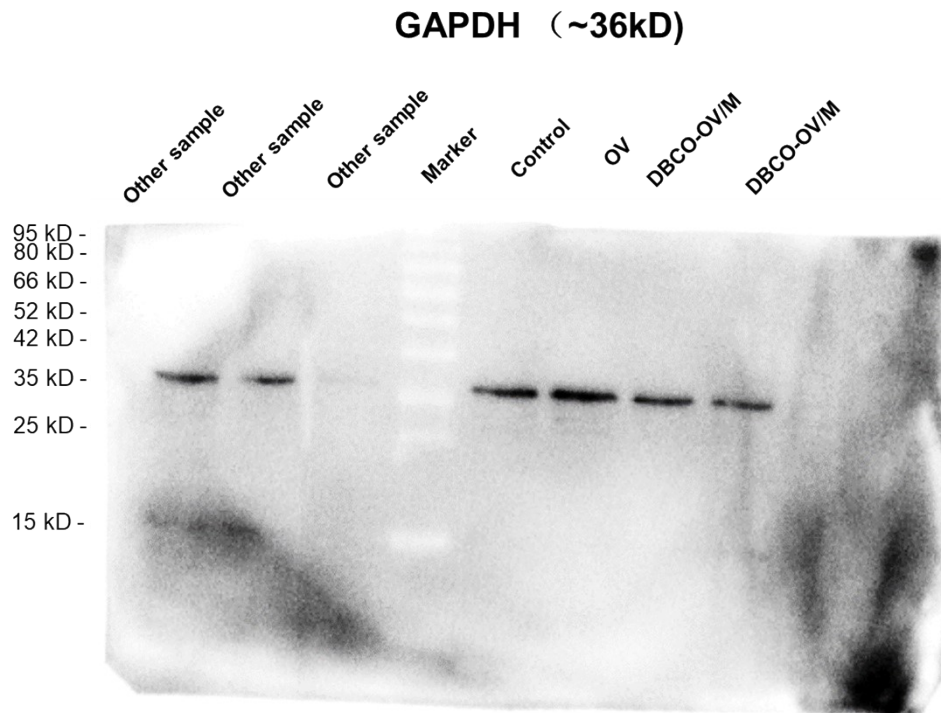

**Figure SR7.** The original image of the full gel and blot on GAPDH of western blot results in Figure S3. Control, OV, DBCO-OV group in Figure S3 and other samples were performed in one and the same PVDF membrane for western blot analysis. The molecular weight of GAPDH in gel is about 36 kDa.
